# Supplementary material for: Reversible thermal transition of polydiacetylene based on KTTKS collagen sequence
Source: Royal Society of Chemistry journal article supplement (doi:10.1039/c2cc34665f), 2012-01-01
Supplement: c2cc34665f.pdf [file c2cc34665f.pdf]

## Supplementary Information

### Reversible Thermal Transition of Polydiacetylene Based on KTTKS Collagen Sequence

Pasquale Palladino, Valeria Castelletto, Ashkan Dehsorkhi, Dmitry Stetsenko, Ian W. Hamley\*

School of Chemistry, Food and Pharmacy, University of Reading, Reading RG6 6AD, U.K.

\*I.W.Hamley@reading.ac.uk

**Materials.** Chemicals were purchased from Sigma-Aldrich or Fisher (UK) unless stated otherwise.

**Synthesis and characterization.** Peptide amphiphile C<sub>25</sub>-KTTKS, 10,12-pentacosadiynoyl-Lys-Thr-Thr-Lys-Ser was prepared by Fmoc solid-phase peptide synthesis on TentaGel S Trt resin (Rapp Polymere) preloaded with Fmoc-Ser(tBu)-OH (0.24 mmol g<sup>-1</sup>) at a 1.75 mmol scale (7 g of resin) using a stepwise elongation protocol and fivefold excess of each of 9-fluorenylmethoxycarbonyl (Fmoc) protected amino acid derivatives Fmoc-Thr(tBu)-OH and Fmoc-Lys(Boc)-OH (Novabiochem). Fmoc removal was achieved by 20% (v/v) piperidine in dimethylformamide (DMF) for 10 min before each coupling. 2-(7-Aza-1H-benzotriazol-1-yl)-1,1,3,3-tetramethyluronium hexafluorophosphate (HATU) (4.75 equiv) with N,N-diisopropylethylamine (DIEA) (10 equiv) in N-methylpyrrolidone-2 (NMP) were employed for activation of the Fmoc amino acids for 5 min at ambient temperature prior to addition to the Fmoc-deprotected resin. The resin was agitated by a gentle stream of nitrogen for 1 hour, then washed with NMP (25 cm<sup>3</sup>) and DMF (50 cm<sup>3</sup>), and the deprotection-coupling cycle was repeated until the last amino acid (Lys) was incorporated and the Fmoc-deprotected, then the 10,12-pentacosadiynoic acid was coupled to the N-terminus of the resin-bound peptide under the same conditions as above (5 equiv acid, 4.75 equiv HATU, 10 equiv DIEA in NMP with 5 min pre-activation and 1 h coupling time). After cleavage from the solid support and deprotection, the peptide was purified by RP-HPLC on a Perkin-Elmer System 200 HPLC chromatograph at ambient temperature using a C18 Supelco column (250×22 mm), a linear gradient of 0.01N aq HCl in acetonitrile (Buffer B) in 0.01N aq HCl in water (Buffer A) and a flow rate of 4 cm<sup>3</sup> min<sup>-1</sup>. The appropriate fractions were pooled and freeze-dried to afford solid peptide. Peptide integrity was confirmed by ESI HRMS (Thermo Scientific LTQ Orbitrap XL): [M+H]<sup>+</sup> C<sub>25</sub>-KTTKS calc. 920.2 Da, obs. 920.6 Da.

**Polymerization.** Polymerization was carried on a 3.5 mM sample in a quartz cell with a path length of 1 mm using a UV lamp with a distance between sample and source of 22 cm.

**UV-VIS spectroscopy.** Polymerization and thermochromic behaviour were followed between 200 nm and 800 nm on a Varian Cary 300 Bio UV-visible spectrophotometer

equipped with temperature controller. Spectra were acquired one minute after the desired temperature was reached. Sample was 3.5 mM or 0.035 mM in a quartz cell with a path length of 0.1 mm or 10 mm, respectively.

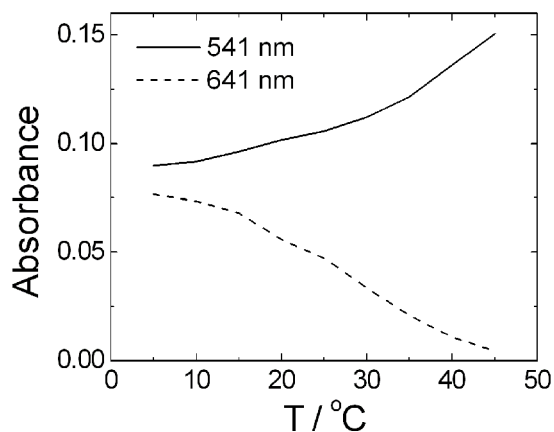

**Figure S1.** Absorbance of C<sub>25</sub>-KTTKS polymer at 541 nm (solid line) and 641 nm (dashed line) on increasing temperature.

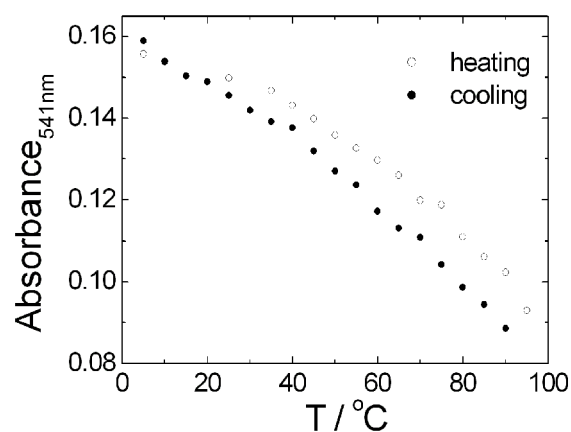

**Figure S2.** Absorbance at 541 nm *versus* temperature (5 °C - 95 °C) of C<sub>25</sub>-KTTKS polymer in the red phase for heated (A) and cooled (B) samples.

**Circular Dichroism (CD).** Spectra were measured using a Chirascan™ CD spectrometer equipped with Peltier thermostatted sample holders and CS/JS recirculating chiller. Spectra on a 0.35 mM sample were acquired with samples in quartz cells (pathlength: 1 mm). The wavelength was from 280 to 180 nm. Final spectra were obtained after subtracting contribution from solvent and converting the signal to units of deg cm<sup>2</sup> dmol<sup>-1</sup>. A UV-visible (180 nm - 680 nm) CD spectrum did not show any significant signal in the polydiacetylene region.

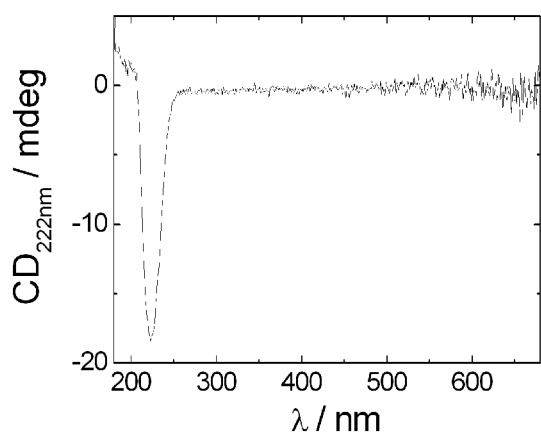

**Figure S3.** UV-visible (180 nm - 680 nm) CD spectrum of C<sub>25</sub>-KTTKS polymer.

**Fourier transform infrared (FTIR).** Spectra of dried film were recorded using a Nexus-FTIR spectrometer equipped with a DTGS detector. All spectra were scanned 128 times over the range of 4000-950 cm<sup>-1</sup>.

**Transmission electron Microscopy (TEM).** TEM experiments were performed using a Philips CM20 transmission electron microscope operated at 200 kV. Droplets of the 3.5 mM solution were placed on Cu grids coated with a carbon film (Agar Scientific, UK), stained with uranyl acetate (1 wt%) and dried.

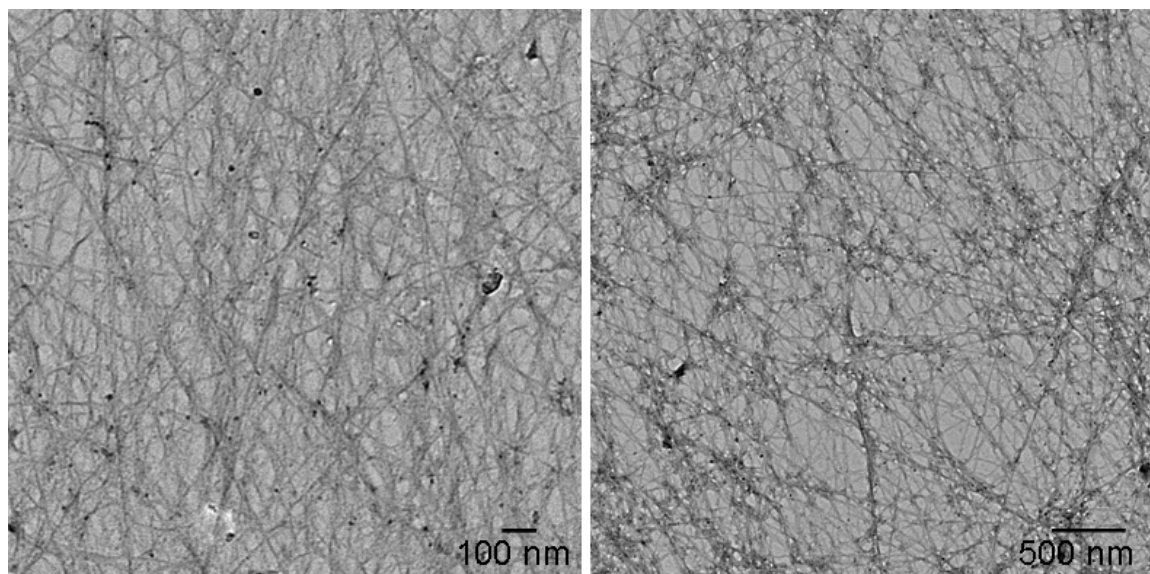

**Figure S4.** TEM images of C<sub>25</sub>-KTTKS in the purple phase, at two magnifications.

**Small-angle X-ray scattering (SAXS).** The measurements were performed on a Bruker Nanostar diffractometer using CuK $\alpha$  radiation from a Incoatec microfocus source. The beam was collimated by a three slit system. Peptide amphiphile (3.5 mM solution) was mounted in a glass capillary (1mm diameter). The sample-detector distance was 67 cm, and a Vantec-2000 photon counting detector was used to collect the SAXS patterns.

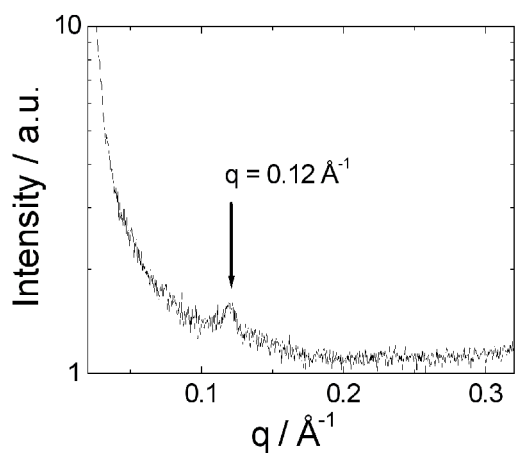

**Figure S5.** One-dimensional SAXS profile showing Bragg peak position for C<sub>25</sub>-KTTKS at 3.5 mM in H<sub>2</sub>O (arrowed peak position  $q^* = 0.12 \text{ \AA}^{-1}$ , corresponding domain spacing  $d = 52 \text{ \AA}$ ).
